# Supplementary material for: Advancing lithium-ion battery performance with heteroatom-based anode architectures for fast charging and high capacity
Source: Royal Society of Chemistry journal article supplement (doi:10.1039/d4cc04776a), 2024-12-12
Supplement: d4cc04776a1.pdf [file d4cc04776a1.pdf]

*Table S1: Comparison of practical battery performance of anodes based on a few parameters*

|                                                                                                                        | <b>Initial Coulombic Efficiency</b> | <b>Coulombic Efficiency (%)</b>                       | <b>Long Cycle Stability</b>                 | <b>Rate performance</b>                                                                                                                            |
|------------------------------------------------------------------------------------------------------------------------|-------------------------------------|-------------------------------------------------------|---------------------------------------------|----------------------------------------------------------------------------------------------------------------------------------------------------|
| <b>Carbon -based anodes</b>                                                                                            |                                     |                                                       |                                             | <b>1C= 372 mA/g wrt. graphite</b>                                                                                                                  |
| Graphite <sup>1</sup><br>(multi-layer pouch cells (>1 Ah) and electrode capacity loadings (3 mAhcm <sup>-2</sup> ))    | 88 %                                | Attained ~100% after 60 cycles at 4C                  | 58% retention after 100 cycles              | 1C – 96% retention after 200 cycles<br>4C- 67% after 100 cycles<br>6C- 58% after 100 cycles                                                        |
| Hard Carbon <sup>1</sup><br>(multi-layer pouch cells (>1 Ah) and electrode capacity loadings (3 mAhcm <sup>-2</sup> )) | 76 %                                | Attained ~100% within first 10 cycles at 3.72 A/g     | 93% after 100 cycles                        | 0.37 A/g – 96% after 200 cycles<br>1.48 A/g- 96% after 100 cycles<br>2.23 A/g- 93% after 100 cycles                                                |
| Heteroatom doped hard carbon <sup>2</sup><br>(coin cell CR2025 type)                                                   | 68 %                                | Attained ~100% from 3 <sup>rd</sup> cycle at 3.72 A/g | 81% after 2300 cycles at 3.72 A/g           | Discharge capacities of ~73, ~52, ~46 and ~32 mAh/g at 3.72, 7.44, 11.16, and 18.60 A/g with 80, 82, 90, and 82%, retention even after 3000 cycles |
| <b>High-Capacity Anodes</b>                                                                                            |                                     |                                                       |                                             |                                                                                                                                                    |
| Micron Silicon                                                                                                         | 86 %                                | Attained ~100% within first 10 cycles                 | 43 % after 8 <sup>th</sup> cycle at 50 mA/g | 242, 82, 38, 14, 4 and 1 mAh/g at 100, 200, 300, 500, 1000 and 2000 mA/g                                                                           |
| Lithium metal <sup>3</sup>                                                                                             | 80 %                                | Attained ~100% within first 15 cycles                 | 60 % after 150 <sup>th</sup> cycle at 2C    | 151.9, 145.8, 136.3, 112.2, and 93.7 mAh/g at 0.5, 1, 2, 5, 10 C (1C=3860 mA/g)                                                                    |
| Organic Anodes <sup>4</sup>                                                                                            | 65 %                                | Attained 99.2% within first 10 cycles                 | 80% after 1100 cycles at 1000 mA/g          | 850, 740, and 300 mAh/g at 400, 750, and 1000 mA/g                                                                                                 |

- 1 K. H. Chen, V. Goel, M. J. Namkoong, M. Wied, S. Müller, V. Wood, J. Sakamoto, K. Thornton and N. P. Dasgupta, *Adv Energy Mater*, DOI:10.1002/aenm.202003336.
- 2 K. S. Patnaik, R. Badam, Y. Peng, K. Higashimine, T. Kaneko and N. Matsumi, *Chemical Communications*, 2021, 57, 13704–13707.
- 3 Y. Hu, Z. Li, Z. Wang, X. Wang, W. Chen, J. Wang, W. Zhong and R. Ma, *Advanced Science*, DOI:10.1002/advs.202206995.
- 4 B. S. Mantripragada, R. Badam and N. Matsumi, *ACS Appl Energy Mater*, 2022, 5, 6903–6912.
